# Supplementary material for: Theory of planned behavior and adherence in chronic illness: a meta-analysis
Source: Springer Nature journal article supplement (doi:10.1007/s10865-015-9644-3), 2015-05-20
Supplement: MOESM1 [file 578312]

Electronic supplementary material 1

Search strategy: PsychINFO (OVID).

Search terms were identical for each database, with field abbreviations being adapted to meet the specific structure for the database where necessary.

1. attitud*.mp.
2. norm*.mp.
3. control.mp.
4. exp intention/ or intention*.mp.
5. 1 AND 2 AND 3 AND 4
6. Theory of planned behavi*.mp. [mp=title, abstract, heading word, table of contents, key concepts, original title, tests & measures]
7. TPB.mp.
8. Theory of reasoned action.mp.
9. TRA.mp.
10. Planned behavi*.mp. [mp=title, abstract, heading word, table of contents, key concepts, original title, tests & measures]
11. Ajzen.mp. [mp=title, abstract, heading word, table of contents, key concepts, original title, tests & measures]
12. 10 AND 11
13. 5 OR 6 OR 7 OR 8 OR 9 OR 12
14. Adherence*.mp
15. Compliance*.mp
16. Concordance*.mp
17. 14 OR 15 OR 16
18. 13 AND 17

Electronic supplementary material 3

*Data Extraction Table: Characteristics of Studies Included in the Meta-analysis of Theory of Planned Behavior and Adherence in Chronic Illness*

| Study | Condition | Sample characteristics  (sample size, mean age in years (SD) and gender) | Study design | Type of Adherence Behavior | Theory of reasoned action/ Theory of planned behavior constructs measured | Adherence outcome measure(s) |
| --- | --- | --- | --- | --- | --- | --- |
| [Blanchard et al. (2002](#_ENREF_2)) | Heart disease | *N* = 81; age = 59.59 (11.49); male = 70% | Correlational; prospective | Exercise [b] | Theory of planned behavior: all | Self-report: Godin leisure-time exercise questionnaire ([Godin & Shephard, 1985](#_ENREF_14))  +  Objective: Attendance at cardiac rehab classes |
| [Blanchard et al. (2003](#_ENREF_3)) | Heart disease | *N* = 215; age = 59.52 (10.90); Gender not reported | Correlational; prospective | Exercise [b] | Theory of planned behavior: all | Objective: Attendance at cardiac rehab classes |
| [Blanchard (2008](#_ENREF_1)) | Heart disease | *N* = 76; age: 62.6 (11.0); male = 76% | Correlational; prospective | Exercise [b] | Theory of planned behavior: all | Self-report: Godin leisure-time exercise questionnaire ([Godin & Shephard, 1985](#_ENREF_14)) |
| [Brown et al. (2009](#_ENREF_4)) | Epilepsy | *N* = 81; age = 41.9 (15.4) intervention and 44.10 (16.4) control; male = 39% | Correlational; prospective* | Medication [a] | Theory of planned behavior: all | Objective: medical events monitoring system |
| [Chapman et al. (1995](#_ENREF_5)) | Diabetes | *N* = 48; age = 67 (4.3); male = 100% | Correlational; prospective | Diet [c] | Theory of planned behavior: attitude, intention, subjective norm | Self-report:  two items addressing whether or not participant had eaten high calorie food and how often |
| [Chisholm et al. (2007](#_ENREF_6)) | Organ transplant - renal | *N* = 158; age = 51 (12.4); male = 60% | Correlational; cross-sectional | Medication [a] | Theory of planned behavior: all | Objective: pharmacy refill records |
| [Cochran and Gitlin (1988](#_ENREF_7)) | Psychiatric - Bipolar | *N* = 48; age 40 (SD not provided); male = 35% | Correlational; cross-sectional | Medication [a] | Theory of reasoned action: all | Self-report: first author’s adapted scale |
| [Conner et al. (1998](#_ENREF_8)) | Psychiatric | *N* = 61; age and gender not reported | Correlational; cross sectional | Medication [a] | Theory of planned behavior: all | Self-report: what percentage of the time did you take your medication? |
| [Costa et al. (2012](#_ENREF_9)) | Type 2 diabetes | *N* = 179; age = 59.6 (SD = 10.33); male = 57.5% | Correlational; cross sectional | Diabetes self-care (blood glucose monitoring) [d] | Theory of planned behavior: all | Self-report: revised summary of diabetes self-care activities questionnaire ([Toobert et al., 2000](#_ENREF_34))  + Objective (HbA1c  levels) |
| [Courneya et al. (2008](#_ENREF_10)) | Breast cancer | *N* = 242; age = 49 (SD not reported; majority aged 50-59); female = 100% | Correlational; prospective* | Exercise [b] | Theory of planned behavior: all | Objective: exercise class attendance |
| [Courneya et al. (2010](#_ENREF_11)) | Lymphoma | *N* = 122; age = 53 (SD not reported); male = 59% | Correlational; prospective* | Exercise [b] | Theory of planned behavior: all | Objective: exercise class attendance |
| [Didarloo et al. (2012](#_ENREF_12)) | Diabetes | *N* = 352; Age = 18-65 (SD not reported); female = 100% | Correlational; cross-sectional | Diabetes self-care [d] | Theory of reasoned action: all | Self-report: revised summary of diabetes self-care activities questionnaire ([Toobert et al., 2000](#_ENREF_34)) |
| [Gatt and Sammut (2008](#_ENREF_13)) | Type 2 diabetes | *N* = 100; age = 64 (SD not reported); male = 39% | Correlational; prospective | Diabetes self-care [d] | Theory of planned behavior: all | Self-report: revised summary of diabetes self-care activities questionnaire |
| [Gucciardi et al. (2007](#_ENREF_15)) | Type 2 diabetes | *N* = 61; age = 60 (SD not reported); male = 31% | Correlational; prospective* | Diet [c] | Theory of planned behavior: all | Self-report: revised summary of diabetes self-care activities questionnaire ([Toobert et al., 2000](#_ENREF_34)) |
| [Hebert et al. (2010](#_ENREF_16)) | Insomnia | *N* = 94; age not reported; male = 38.3% | Correlational; cross-sectional | Implementing sleep hygiene practices at home [d] | Theory of planned behavior: subjective norm, intention, perceived behavioral control | Self-report: wording not reported |
| [Hunt and Gross (2009](#_ENREF_18)) | Obesity | *N* = 212; age = 41.23 (10.54); male = 21.2% | Correlational; prospective | Exercise [b] | Theory of planned behavior: all | Self-report: Godin leisure-time exercise questionnaire ([Godin & Shephard, 1985](#_ENREF_14)) and international physical activity questionnaire ([World Health Organization, 2000](#_ENREF_36)) |
| [Jeon and Lee (2006](#_ENREF_19)) | Hypertension | *N* =166; majority in their sixties (26.8%); male = 43.6% | Correlational; cross-sectional | Medication [a] | Theory of planned behavior: attitude, subjective norm | Self-report: wording not reported |
| [Manning and Bettencourt (2011](#_ENREF_23)) | Breast cancer | *N* = 162; age not reported; female = 100% | Correlational; prospective | Medication [a] | Theory of planned behavior; all | Self-report: medication adherence report scale ([Horne & Weinman, 1999](#_ENREF_17)) |
| [Miller et al. (1992](#_ENREF_25)) | Hypertension | *N* = 56; age = 61.75 (10.74); male = 98% | Correlational; cross -sectional | Self-care (diet, not smoking, activity, stress, management and medication)  [a, b, c, d] | Theory of reasoned action: all | Self-report: health behaviours scale ([Miller et al., 1982](#_ENREF_24)) |
| [Quine et al. (2012](#_ENREF_27)) | Hypertension | *N* = 1070; age = 69.0 (11.7); male = 42% | Correlational; prospective | Medication [a] | Theory of planned behavior: all | Self-report: augmented version of the Morisky medication adherence scale ([Morisky et al., 1986](#_ENREF_26)) |
| [Saal and Kagee (2012](#_ENREF_28)) | HIV | *N* = 101; age = 35 (7.05); male = 17.8% | Correlational; cross-sectional | Medication [a] | Theory of planned behavior: all | Self-report: Morisky medication adherence scale ([Morisky et al., 1986](#_ENREF_26)) |
| [Sainsbury and Mullan (2011](#_ENREF_29)) | Coeliac disease | *N* = 265; age = 45.1 (13.0); male = 16.6% | Correlational; cross-sectional | Diet [c] | Theory of planned behavior: all | Self-report: coeliac dietary adherence test ([Leffler et al., 2009](#_ENREF_22)) |
| [Sainsbury et al. (2013](#_ENREF_30)) | Coeliac disease | *N* = 390; age= 44.2 (12.7); male = 17.2% | Correlational; cross-sectional | Diet [c] | Theory of planned behavior: all | Self-report: coeliac dietary adherence test ([Leffler et al., 2009](#_ENREF_22)) |
| [Scholz et al. (2012](#_ENREF_31)) | Organ transplant  (heart, lung, liver or kidney) | *N* =121; age = 54.32 (13.32); male = 67% | Correlational; cross- sectional | Medication [a] | Theory of planned behavior: all | Self- report: German version of the transplant effects questionnaire ([Klaghofer et al., 2008](#_ENREF_20)) |
| [Sniehotta et al. (2010](#_ENREF_32)) | Heart disease | *N* = 95; age = 63 (10.3); male = 72.8% | Correlational; prospective | Exercise [b] | Theory of planned behavior: intention, perceived behavioral control | Self-report: Godin leisure-time exercise questionnaire ([Godin & Shephard, 1985](#_ENREF_14))  +  Objective: attendance at cardiac rehab classes |
| [Syrjala et al. (2002](#_ENREF_33)) | Diabetes | *N* = 149; age = 34 (SD not reported); male = 58.3% | Correlational; cross- sectional | Self-care - tooth brushing [d] | Theory of reasoned action: all | Self-report: diabetes adherence scale ([Kneckt et al., 1999](#_ENREF_21)). |
| [Vissman et al. (2013](#_ENREF_35)) | HIV/AIDS | *N* = 66; age = 38 (10.3); male = 74% | Correlational; cross-sectional | Medication [a] | Theory of planned behavior: attitude, subjective norm, perceived behavioral control | Self-report: two-item scale |

Note: [a] = Denotes studies coded for moderators as medication adherence; [b] = Denotes studies coded for moderators as exercise adherence; [c] = Denotes studies coded for moderators as diet adherence; [d] = Denotes studies coded for moderators as self-care.*Study had an experimental design but have been classified as correlational because the intervention was not aimed at changing the theory of planned behavior variables.

**References**

Blanchard, C. (2008). Understanding exercise behaviour during home-based cardiac rehabilitation: a theory of planned behaviour perspective. *Canadian Journal of Physiology and Pharmacology, 86*, 8-15.

Blanchard, C. M., et al. (2002). Determinants of exercise intention and behavior during and after phase 2 cardiac rehabilitation: An application of the theory of planned behavior. *Rehabilitation Psychology, 47*, 308.

Blanchard, C. M., et al. (2003). Is the theory of planned behavior a useful framework for understanding exercise adherence during phase II cardiac rehabilitation? *Journal of Cardiopulmonary Rehabilitation and Prevention, 23*, 29-39.

Brown, I., et al. (2009). Enhancing antiepileptic drug adherence: a randomized controlled trial. *Epilepsy & Behavior, 16*, 634-639.

Chapman, K. M., et al. (1995). Applying behavioral models to dietary education of elderly diabetic patients. *Journal of Nutrition Education, 27*, 75-79.

Chisholm, M. A., et al. (2007). Predicting adherence to immunosuppressant therapy: a prospective analysis of the theory of planned behaviour. *Nephrology Dialysis Transplantation, 22*, 2339-2348.

Cochran, S. D., & Gitlin, M. J. (1988). Attitudinal correlates of lithium compliance in bipolar affective disorders. *Journal of Nervous and Mental Disease, 176*, 457-464.

Conner, M., et al. (1998). Understanding drug compliance in a psychiatric population: An application of the theory of planned behaviour. *Psychology, Health & Medicine, 3*, 337-344.

Costa, V., et al. (2012). Partner support, social-cognitive variables and their role in adherence to self-monitoring of blood glucose in type 2 diabetes. *European Diabetes Nursing, 9*, 81-86.

Courneya, K. S., et al. (2008). Predictors of supervised exercise adherence during breast cancer chemotherapy. *Medicine and Science in Sports and Exercise, 40*, 1180-1187.

Courneya, K. S., et al. (2010). Predictors of adherence to supervised exercise in lymphoma patients participating in a randomized controlled trial. *Annals of Behavioral Medicine, 40*, 30-39.

Didarloo, A. R., et al. (2012). Prediction of Self-Management Behavior among Iranian Women with Type 2 Diabetes: Application of the Theory of Reasoned Action along with Self-Efficacy (ETRA). *Iranian Red Crescent Medical Journal, 14*, 86-95.

Gatt, S., & Sammut, R. (2008). An exploratory study of predictors of self-care behaviour in persons with type 2 diabetes. *International Journal of Nursing Studies, 45*, 1525-1533.

Godin, G., & Shephard, R. J. (1985). A simple method to assess exercise behavior in the community. *Canadian Journal of Applied Sport Sciences. Journal Canadien des Sciences Appliquees Au Sport, 10*, 141-146.

Gucciardi, E., et al. (2007). Assessment of two culturally competent diabetes education methods: individual versus individual plus group education in Canadian Portuguese adults with type 2 diabetes. *Ethnicity and Health, 12*, 163-187.

Hebert, E. A., et al. (2010). Attrition and adherence in the online treatment of chronic insomnia. *Behavioral Sleep Medicine, 8*, 141-150.

Horne, R., & Weinman, J. (1999). Patients' beliefs about prescribed medicines and their role in adherence to treatment in chronic physical illness. *Journal of Psychosomatic Research, 47*, 555-567.

Hunt, H. R., & Gross, A. M. (2009). Prediction of exercise in patients across various stages of bariatric surgery: a comparison of the merits of the theory of reasoned action versus the theory of planned behavior. *Behavior Modification, 33*, 795-817.

Jeon, S. Y., & Lee, S. G. (2006). The effect of changes in attitude and subjective norm on treatment compliance in hypertension patients. *Journal of Applied Biobehavioral Research, 11*, 265-287.

Klaghofer, R., et al. (2008). Questionnaire on emotional response after organ transplantation: German validation of the Transplant Effect Questionnaire (TxEQ-D). *Zeitschrift Für Psychosomatische Medizin Und Psychotherapie, 54*, 174.

Kneckt, M. C., et al. (1999). Locus of control beliefs predicting oral and diabetes health behavior and health status. *Acta Odontologica, 57*, 127-131.

Leffler, D. A., et al. (2009). A simple validated gluten-free diet adherence survey for adults with celiac disease. *Clinical Gastroenterology and Hepatology, 7*, 530-536.

Manning, M., & Bettencourt, B. A. (2011). Depression and medication adherence among breast cancer survivors: bridging the gap with the theory of planned behaviour. *Psychology and Health, 26*, 1173-1187.

Miller, P., et al. (1982). Health beliefs of and adherence to the medical regimen by patients with ischemic heart disease. *Heart and Lung, 11*, 332-339.

Miller, P., et al. (1992). Fishbein's Model of Reasoned Action and compliance behavior of hypertensive patients. *Nursing Research, 41*, 104-106.

Morisky, D. E., et al. (1986). Concurrent and Predictive Validity of a Self-Reported Measure of Medication Adherence. *Medical Care, 24*, 67-74.

Quine, L., et al. (2012). Adherence to anti-hypertensive medication: Proposing and testing a conceptual model. *British Journal of Health Psychology, 17*, 202-219.

Saal, W., & Kagee, A. (2012). The applicability of the Theory of Planned Behaviour in predicting adherence to ART among a South African sample. *Journal of Health Psychology, 17*, 362-370.

Sainsbury, K., & Mullan, B. (2011). Measuring beliefs about gluten free diet adherence in adult coeliac disease using the theory of planned behaviour. *Appetite, 56*, 476-483.

Sainsbury, K., et al. (2013). Gluten free diet adherence in coeliac disease. The role of psychological symptoms in bridging the intention–behaviour gap. *Appetite, 61*, 52-58.

Scholz, U., et al. (2012). Predicting intentions and adherence behavior in the context of organ transplantation: Gender differences of provided social support. *Journal of Psychosomatic Research, 72*, 214-219.

Sniehotta, F. F., et al. (2010). Adoption of community-based cardiac rehabilitation programs and physical activity following phase III cardiac rehabilitation in Scotland: A prospective and predictive study. *Psychology and Health, 25*, 839-854.

Syrjala, A. M. H., et al. (2002). The theory of reasoned action in describing tooth brushing, dental caries and diabetes adherence among diabetic patients. *Journal of Clinical Periodontology, 29*, 427-432.

Toobert, D. J., et al. (2000). The summary of diabetes self-care activities measure: results from 7 studies and a revised scale. *Diabetes Care, 23* 943-950.

Vissman, A. T., et al. (2013). Correlates of HAART adherence among immigrant Latinos in the Southeastern United States. *AIDS Care, 25*, 356-363.

World Health Organization. (2000). Obesity: preventing and managing the global epidemic. Report of a WHO consultation. *WHO Technical Report Series, 894*.
